# Supplementary material
Source: publisher site journal article supplement (https://www.dovepress.com/article/538655)
Supplement: Supplementary file 1 [file 538655%20appendix.docx]

**Appendix**. **Daviel’s Claims to have Performed Cataract Extraction in 1745, and the Dating of the Garion Case**.

When in 1748, Daviel first wrote about the 1745 case of the hermit treated in Marseille, Daviel had described it merely as a difficult bilateral couching which resulted in suppuration (Daviel Sep. 1748). But, in 1752, Daviel added that after the couching, he incised the cornea with a needle and scissors to remove blood and lens fragments from the anterior chamber (Daviel 1753, Daviel 1967). Hirschberg believed that Daviel misremembered the facts in the second telling: “Daviel apparently transferred in 1752 something that he had experienced at a later operation due to a slip of memory to the operation on the *eremite* [hermit].” (Hirschberg 1984, vol. 3, p. 163) By the time of his manuscript running through the end of the 1752, this April 1745 couching of Frere Felix is placed on the list of extractions of cataracts from the posterior chamber, with the outcome “*bien reussi*” (André, Daviel 2005).

From Daviel’s Sep. 1748 letter, we know that the seventh patient undergoing the new, two-instrument couching technique travelled from Paris to Marseille, arriving in September 1745, and had his cataract couched on Oct. 18, 1745 (Daviel Sep. 1748). If you believe Daviel’s 1752 presentation (Daviel 1753, Daviel 1967), Daviel had, in October 1745, three options he could have presented to the patient: the old couching technique, the two-instrument couching technique, or extraction. By an amazing coincidence, this patient, if he had opted for extraction, would have been the seventh patient having extraction, according to Daviel’s manuscript discovered in 2004 (André, Daviel 2005). But, as it happened, the patient made a different choice, and became the seventh patient having Daviel’s new couching method, according to Daviel’s 1748 letter (Daviel Sep. 1748). Clearly, Daviel is conflating his later extraction method with his 1745 couching technique.

If you accept all of Daviel’s writings uncritically, you would believe he performed 5 successful cataract extractions between May 5, 1745 and Sep. 4, 1745, and then squeezed in an unknown number of less successful cataract extractions immediately (which strangely do not appear in his log), and 6 of the new couching technique surgeries in a couple of weeks, so that when the patient arrived later in September, he could be the seventh patient to be couched in the new manner (André, Daviel 2005; Daviel Sep. 1748; Daviel 1753; Daviel 1967). You would also believe that Daviel performed 5 consecutive successful planned extractions of cataracts from the posterior chamber in mid-1745, but refused to mention that fact in his letters touting his cataract surgery accomplishments and innovations in 1748 and 1749 (Daviel Sep. 1748; Daviel July 1749). One might also wonder why he was so excited by the prospects of cataract extraction after his experience removing cataract fragments following the failed couching in M. Garion, the wig-maker, which had taken place in Paris by September 1748. The wig-maker’s case would have been a setback to what he had supposedly already accomplished. A straightforward reading of Daviel’s letters of September 1748 and July 1749 makes it abundantly clear that (with the exception of Garion’s case), Daviel was couching, not performing extraction, prior to July 1749 (Daviel Sep. 1748; Daviel July 1749).

This brings us to an analysis of the surgery of M. Garion, the wig-maker. When Daviel initially presented the case in September 1748 and July 1749, he repeatedly referred to it simply as the case of Garion, without specifying the date of the surgery (Daviel Sep. 1748; Daviel July 1749). When challenged in 1749, Daviel invited skeptics to speak with Garion to confirm that the operation occurred (Daviel July 1749). In 1752, Daviel recounted the tale of an apparently similar surgery in an unnamed patient (Daviel 1753; Daviel 1967). This patient has generally been assumed to be Garion, and this assumption is confirmed by Daviel’s undated manuscript (André, Daviel 2005). In his 1752 report, Daviel specifies that the unnamed patient was operated on April 8, 1747, i.e., just before Pallucci arrived in Paris (Daviel 1753; Daviel 1967). By not providing Garion’s name in 1752, Daviel prevented anyone from confirming with Garion whether he really had the surgery before Pallucci arrived in Paris in July 1747. Whereas previously Daviel had not stated how he performed the incision, now Daviel specified that he made the incision by introducing a needle, and then enlarging the incision with scissors (“*des petits ciseaux courbes*”) (Daviel 1753; Daviel 1967). In 1748, Daviel had specified that a needle (“*aiguille*”) was introduced into the eye to remove the cataract (Daviel Sep. 1748). In the 1752 version, the incision was large enough for Daviel to introduce a small spatula (“*ma petite spatule*”) (Daviel 1753; Daviel 1967).

**References for Appendix**.

André L, Daviel J. *“Liste des Malades a qui J’ai Fait l’extraction de la Cataracte de la Chambre Postérieure de l’oeil par la nouvelle methode que j’ay inventé a Marseille depuis 1745.” Manuscrit inédit de Jacques Daviel. Par le Médecin Général Inspecteur Louis André. Communication à la Société Francophon’ d’Histoire d’ l’Ophtalmologie. Le 8 mai 2004 à Paris France. Provence historique: Revue Trimestrielle*. 2005: 421-433. Available from: [https://www.snof.org/encyclopedie/un-manuscrit-in%C3%A9dit-de-daviel](https://www.snof.org/encyclopedie/un-manuscrit-in%C3%A9dit-de-davielA) Accessed June 1, 2023.

Daviel J*. Lettre de M. Daviel, Conseiller, Chirurgien ordinaire du Roi en Survivance & par quartier, à M. de Joyeuse, Docteur en Medecine de l’Université de Montpellier, Aggregé au Collége des Medecins de Marseille, & Médecin des Hôpitaux des Galéres. Mercure de France*. Paris. Sep. 1748, p. 198-221.

Daviel J. *Réponse de M. Daviel, Conseiller-Chirurgien ordinaire, & Oculiste du Roi, à la Lettre Critique de M. Roussilles. Mercure de France*. July 1749; 7: 206-227.

Daviel J. *Sur une Nouvelle Methode de Guérir la Cataracte par l’Extraction du Crystalllin. Mémoires de l’Académie Royale de Chirurgie*, T. II, Paris 1753, pp. 337-354.

Daviel JA, Pearce WG (trans.). On a new method to cure cataract by extraction of the lens by Jacques Daviel, translated by W. G. Pearce. Brit. J. Ophthalmol. 1967 Jul;51(7):449-58.

Hirschberg J, Blodi FC. The History of Ophthalmology. Vol 3. The Renaissance of Ophthalmology in the Eighteenth Century. (Part One) Bonn 1984. J. P. Wayenborgh Verlag. pp. 5-393.
